# Supplementary material for: DIRProt: a computational approach for discriminating insecticide resistant proteins from non-resistant proteins
Source: PubMed Central journal article supplement (PMC5364559; doi:10.1186/s12859-017-1587-y), 2017-03-24
Supplement: 12859_2017_1587_MOESM1_ESM.pdf [file 12859_2017_1587_MOESM1_ESM.pdf]

## Summary of the insect species and the type of resistant genes

| <b>Insect species</b>       | <b>Resistant genes</b>                  |
|-----------------------------|-----------------------------------------|
| <i>Helicoverpa armigera</i> | Cytochrome P450<br>Acetylcholinesterase |
| <i>Aphis gossypii</i>       | Cytochrome P450<br>KDR                  |
| <i>Acyrtosiphon pisum</i>   | Cytochrome P450<br>Acetylcholinesterase |
| <i>Bemisia tabaci</i>       | Cytochrome P450<br>Acetylcholinesterase |
| <i>Plutella xylostella</i>  | Cytochrome P450<br>RDL                  |
| <i>Spodoptera exigua</i>    | Cytochrome P450                         |
| <i>Spodoptera litura</i>    | Cytochrome P450                         |
| <i>Nilaparavata lugena</i>  | Cytochrome P450                         |
| <i>Myzus persicae</i>       | Cytochrome P450                         |
| <i>Tribolium castaneum</i>  | Cytochrome P450<br>RDL                  |
| <i>Leucinodes orbonalis</i> | Acetylcholinesterase                    |

## Independent test dataset

### Cytochrome P450 (53)

>NP\_610390.1 Cyp6a13 [Drosophila melanogaster]

MLTLLVLVFTVGLLLYVKLRWHYSYWSRRGVAGERPVYFRGNMSGLGRDLHWTDLINLRIYRKFRGVERYC  
GYFTFMTKSLFIMDLELIRDIMIRDFSSFADRGLFHNVRDDPLTGNNLFLDGPWRWLRQNLTVFTSGK  
MKFMFPNMVEVGEKLTQACRLQVGEIEAKDLCARFTTDDVIGSCAFGLECNLQDPESQFRMRGRSVTQEP  
LHSVLVQAQAFMQPELARKLRFRLFRPEVSEFFLDTVRQTLDYRRRENIHRNDLIQLLMELGEEGVKDAL  
SFEQIAAQALVFFLAGFDTSSTTMSFCLYELALNPDVQERLRVEVLAVLKRNNQKLTYSVQEMPYLDQV  
VAETLRKYPILPHLLRRSTKEYQIPNSNLILEPGSKIIIPVHSIHHDPELYPDPEKFDPSRFEPEEIKAR  
HPFAYLPPFEGGPRNCIGERFGKLQVKVGLVYLLRDFKFSRSEKTQIPLKFSSRNFLISTQEGVHLRMEGL  
ERP

>NP\_652075.1 Cyp6a22, isoform A [Drosophila melanogaster]

MLDVVALLLIALAVGFWFVRTRYSYWTRRGIGSEPARFPVGNMEGFRKNKHFIDIVTPIYEKFKGNGAPF  
AGFFMMLRPVVLVTDLELAKQILIQDFANFEDRGMYNHNERDDPLTGHLFRIDGPKWRPLRQKMSPTFTSA  
KMKYMFPTVCEVGEELTQVCGELADNAMCGILEIGDLMARYTSDVIGRCAFGVECNGLRNPEAEFAIMGR  
RAFSERRHCKLVDGFIESFPEVARFLMRQIHQDITDFYVGIVRETVKQREEQGIVRSDFMNLLEMKQR  
GELTIEEMAAQAFIFFAAGFDTSASTLGFALYELAKQPALQAKLREEIDQALRLHNGEFTYDSMQELRYM  
ELVIAETLRKYPILPQLTRISRHLAAKGRHFYIEPGQMLLIPVYGIHHDPALYPEPHKFIPEFLADQ  
LAQRPTAAWLPPGDGPRNCIGMRFGKMQTTIGLVSLLRNFHFSVCPRTDPKIEFLKSNILLCPANGIYLK  
VQQLSQMSS

>NP\_523628.1 cytochrome P450-6a2 [Drosophila melanogaster]

MFVLIYLLIAISSLLAYLHRNFNYWNRGVPHPDAPHPLYGNMVGFRKNRVMHDFDYDYNKYRKSGFPF  
VGFYFLHKPAAAFIVDTQLAKNILIKDFSNFADRGQFHNGRDDPLTQHLFNLDGKKWKDMRQRLTPTFTSG  
KMKFMFPTVIKVSEEFVKVITEQVPAQNGAVLEIKELMARFTTDDVIGTCAFGIECNTLRTPVSDFRMTG  
QKVFTDMRHGKLLTMFVFSFPKLASRLRMRMPEDVHQFFMRLVNDTIALRERENFKRNDFMNLLIELKQ  
KGRVTLDNAGEVIEGMDIGELAAQVVFVYVAGFETSSSTMSYCLYELAQNQDIQDRLRNEIQTVLEEQEGQ  
LTYESIKAMTYLNQVISETLRLYTLVPHLERKALNDYVVPGHEKLVIEKGTQV IIPACAYHRDEDLYPNP  
ETFDPERFSPEKVAARESVEWLPPGDGPRNCIGMRFGQMQRIGLAQIISRFRVSVCDTTEIPLKYS PMS  
IVLGTVGGIYLRVERI

>NP\_523748.2 cytochrome P450-6a9 [Drosophila melanogaster]

MGVYSVLLAIVVVLVGYLLLKWRRALHYQNLDIPCEEPHILMGSLTGVQTSRSFSAIWM DYNNKFRGTG

PFAGFYWFQRPGLVLDISLAKLILIKEFNKFTDRGFYHNTEDDPLSGQLFLLDGQKWKSMRSLSYTFT  
SGKMKYMFPTVVKVGHEFIEVFGQAMEKSPIVEVRDILARFTTDDVIGTCAFGIECSSLKDPEAEFRVMGR  
RAIFEQRHGPIGIAFINSFQNLARRLHMKITLLEEAHFFLRIVRETVAFREKNNIRRNDFMDQLIDLKNS  
PLTKSESGESVNLTIEMAAQAFVFFGAGFETSSTTMGFALYELAQHQDIQDRVRKECQEVIKGYNGEIT  
YESMKDMVYLDQVISETLRLYTVLPVLNRECLEDEYVPGHPKYVIKKGMPVLI PCGAMHRDEKLYANPNT  
FNPDNFSPERVKERDSVEWLPFGDGPRNCIGMRFGQMARSGLALLINRFKFSVCEQTTIPIVYSKKTFL  
ISSETGIFLKVERV

>NP\_650224.3 Cyp313a4 [Drosophila melanogaster]

MLTWTLWCGLLFLLWIYFLWSRRRFYLLTLKIPGPLGYPI LGMAHWLMRREDILNAFGCFLDKHGPTIFS  
WLGPIPFMIVSDPQVVQDIFTSPHCVNKGI IYKAVDDGAGVGLFSLKDRWSIHRKLLNPAFGHKVLLSF  
LPIFNRETALLLDQLEPLQDDGKDLI PLLQSFTLGIATQTTMGSDVKDEESFRSNSLLGRYQCILETMT  
DMCFSPWLNSRFRQLAGKESHYYQAKTEIRQFIRKIERKLAEDEMGALPSIQSNDKNLFLNLVTDLMR  
RGVFTLKNVEDESNIIVFGAFETTANAVYYTLMLLAMFPEYQERAFEEIKTIFPNTGDFDVSADTQQMV  
YLDLILNESMRVIPPVVSQRQTSQDLKLSNGIVVPGVQIAIDIYHMHRSKKIWGPDAETFNPDHFLPH  
NIQDKHPYAYIPFTKGIRNCIGWRYALISAKVTLAKLLRNRYFKTSFPFENLYFVEDITMKLKSVP LLEL  
QKRT

>NP\_611000.2 Cyp6a23 [Drosophila melanogaster]

MSLLTLIALLVSLLLFMARRRHGYWQRGIPHDVPHPIYGNMKDWPKKRHIAMIFRDYYTKYKRSVYPF  
AGFYFFFTRSAVITDLELVKRVLIKDFNHFENRGIFYNEIDDPLSATLFSIEGQKWRHLRHKLTPFTSG  
KMKNMFPIIVKVGEEMEKIFSAKTTTGEGQVLEIVDLVARYTADVIGNCAFGLNCSLQNPNAEFVTIGK  
RAIIERRYGGLDFLI FGFPKLSRRLRLKLNVDVEDFYTSIVRNTIDYRLRTNEKRHDFMDSLIEMYEK  
EQAGNTEDGLSFNEILAQAFIFFVAGFETSSTTMGFALYELALDQDIQDQLRAEINNVLSKHNEFTYEG  
IKEMKYLEQVVMETLRKYPVLAHLTRMTQTDSPEDPKYFIAKGTTVVIPALGIHYDPEIYPEPEKFKPE  
RFTDEAIAARPCTWLPFGGPRNCIGLRFGLMQACVGLAYLIRGYKFSVSTETQIPMKFVVKSI LLSAE  
NGIHLKVEKLSK

>NP\_610743.2 Cyp6g1, isoform A [Drosophila melanogaster]

MVLTEVLFVVVAALVALYTWQFNHSYWQRKGIPYIPPTPIIGNTKVVFKMENSFGMHLSEIYNDPRLKD  
EAVVGIYSMNKPLIIRDIELIKSILIKDFNRFHNRYARCDPHGDPLGYNNLFFVRDAHKGIRTKLTPV  
FTSGKVKQMYTLMQEIGKDLELALQRRGEKNSGSFITEIKEICAQFSTDSIATIAFGIRANLENPNAEF  
RNYGRKMF TTVARAKDFVFAFFLPKLVSLMRIQFFTADF SHFMRSTIGHVMEERERSGLLRNDLIDVLV  
SLRKEAAAEPKPHYAKNQDFLVAQAGVFFTAGFETSSTMSFALYEMAKHPMQKRLRDEINEALVEGG  
GSLSYEKIQSLEYLAMVVDEVLRMYPVLPFLDREYESVEGQPDLSLKPFDYDTLENGTPVFPIYALHHD

PKYWTNPSQFDPERFSPANRKNIVAMAYQFFGSGPHNCIGSRIGLLQSKLGLVSLLNHSVRNCEATMKD  
MKFDPKGFVLQADGGIHLEIVNDRLYDQSAPSLQ

>NP\_476907.2 cytochrome P450-4d1, isoform A [Drosophila melanogaster]  
MFLVIGAILASALFVGLLLYHLKFKRLIDLISYMPGPPVLPVVGHHHFIGKPPHEMVKKIFEFMETYSK  
DQVLKVVWLGPELNVLMGNPKDVEVVLGTLRFNDKAGEYKALEPWLKEGLLVSRGRKWHKRRKIITPAHFH  
KILDQFVEVFEKGSRDLLRNMEQDRLKHGDSGFSLYDWINLCTMDTICETAMGVSINAQSNADSEYVQAV  
KTISMVLHKRMFNILYRFDLTYMLTPLARAEEKALNVLHQFTEKIIVQRREELIREGSSQESSNDDADVG  
AKRKMAFLDILLQSTVDERPLSNLDIREEVDTFMFEGHDTTSSALMFFFYNIATHPEAQKCFEEIRSVV  
GNDKSTPVSYELLNQLHYVDLCVKETLRMYPSVPLLRKVLLEDCEINGKLIPAGTNIGISPLYLGRREEL  
FSEPNIFFKPERFDVVTAEKLNPIYAI PFSAGPRNCIGQKFAMLEIKAIVANVLRHYEVDFVGDSSPEPPV  
LIAELILRTKEPLMFKVRERVY

>NP\_649151.1 Cyp305a1 [Drosophila melanogaster]  
MSALIFLCAILIGFVIYSLISSARRPKNFPPGPRFVPWLGNLQFRKEASAVGGQHILFERWAKDFRSDL  
VGLKLGREYVVVALGHEMVKEVQLQEVFEGRPDNFFLRRLRTMGRKGITCTDGQLWYEHHRHFAMQMRNV  
GYGRSQMEHHIELEAEELLGQLERTEEQPIEPVTWLAQSVLNVLWCLIAGKRIARQEDGTLRRLDLDMNR  
RSKLFDICGGLLAQFPWLRHVAPDRGTGYNLIQQLNTELYGFFMDTIEEHRRLAKDPSPAESDLIYAYLQ  
EMKDRSAGGESSTFNETQLVMTILDFFIAGSQTTNTINLALMVLAMRPDVQEKLFQSQTASVAAASTDA  
FPHLSRREAFDYMDAFIMEVQRFFHITPITGPRRALWATKLGGYDIPKNATILISLRSVHLDKEHWKDPL  
EFRPERFIDSAGKCFKDEYFMPFGMGRRCCLGDALARACIFSFLVRIVQHFSVVL PAGESPSMVLLPGIT  
LTPKPYKVQFVKRT

>NP\_525044.1 cytochrome P450-4ae1 [Drosophila melanogaster]  
MLVVLLVALLVTRLVASLFRALKELRHPLQGVVPSVSRVPLLGAAWQMRSFQPDNLHDKFAEYVVKRFGR  
SFMGTVLGHVVMVTAEPRHIDALLQGQHQLKKGTMFYALRGWLDGLLLSRGKEWHTMRKIITPTFHFSI  
LEQFVEVFDROSSILVERLRTLSTYGNVNIYPLVGLAALDIITETAMGVNVDAQGADSEVVHAVKDLTN  
ILATRFRPHLLFPHLFRLCWPSGFRKQAGVICLHEFTNGIIEQRRLLAREANQDKPTKPHALLDTLL  
RATVDGQPLTDKQIRDEVNTFIFEGHDTTSAVSFCLYLLSRHEAVQQKLFEELRMHYQDLFRGVILSD  
FATLPYLSCVVKESLRLYPPIPAVARCLEKDLVIDEGYIPVGTNVVLLWQLLRDEAIFTDPLVFQPERH  
LGEEAPRLSPYSYIPFSAGPRNCIGQKFALLEMKTMTVKVIRHYQLLPMGADVPSIKIVLRKSGVNVG  
LRPRLY

>NP\_611002.3 Cyp6a20 [Drosophila melanogaster]  
MAVMIVLLIGVITFVAWYVHQHFNWKRRIIPHDEPKIPYGNLSELMKTVHFADIFKRITYNKLNRKTDGP

FVGFYMYFKRMVVVTDIDFAKTVLIREFDKFDHGRGVFHNERDDPLSANLVNIDGQKWKTLRQKLTPTFTS  
GKMKTMFPTILTVGDELIRVGETASADSDSMEITNVVARFTADVIGSCAFGLDCHSLSDPKAKFVQMGT  
TAITERRHGKSMDDLLFGAPELAALKRMKATVQEVEDFYMNIIRDVTDYRVKNNVKRHDFVDMLIEMKLLK  
FDNGDKENGLTFNEIAAQAFIFFLAGFETSSTTMGFALYELACHQDIQDKLRTEINTVLKQHNGKLDYDS  
MREMTYLEKVIDETMRKRPVVGHLIRVATQHYQHTNPKYNIKGTGVIVPTLAIHHDPEFYPEPEKFIPE  
RFDEDVQVQRPACTFLPFGDGPRNCIGLRFGRMQVIVGMALLIHNFKFEFHPTKTVVPLEYRTDDFLLSS  
KGGIHLKVTRV

>NP\_611003.2 Cyp6a21 [Drosophila melanogaster]

MSVGTVLLTALLALVGYLLMKWRSTMRHWQDLGIPCEEPHILMGSMKGVRTARFNEIWTSYNKFRRSG  
PFAGFYWFRRAVAVVLETSKQILIKEFNKFTDRGFFHNPEDDPLSGQLFLLDGQKWRMTRNKLSTFT  
SGKMKYMFPTVVKVANEFTDVFQGNVAKSPVVEVRELLARFTTDVIGTCAFGIECSSLKDPDAEFREMGR  
RSLTEQRLGVPVIGFVNSFPNLARLHMKMTAEPIERFFMRIVRETVAFREQNNIRRNDFMDQLIDLKKN  
PLMVSQSGESVNLTIIEIAAQAFVFFAAGFETSSTTMGFALYELAQNQDIQNRVRKECQEVIKCNKNGELN  
YESMKDLVYLDQVVSSETLRLYTVLPVLNRECLEDEYVPGHPKYVIKKGMPVLI PCGAMHRDEKLYANPT  
FNPDNFSPERVKERDSVEWLPFGDGPRNCIGMRFGMQARIGLALLIKDFKFSVCEKTTIPMTYNKEMFL  
IASNSGIYLKAERV

>NP\_610744.1 Cyp6g2 [Drosophila melanogaster]

MELVLLILVASLIGIAFLALQQHYSYWRMGVREIRPKWIVGNLMGLLNMRMSPAEFISQLYNHPDAENE  
PFVGIHVHFKPALLLRDPEMVRNILVKDFAGFSNRYSSSDPKGDPLGSQNIFFLKNPAWKEVRLKLSPPF  
TGNRLKQMFPLIEEVGASLDAHLRQQPLHNERMRCFDLEAKELCALYTTDVIATVAYGVSANSFTDPKCE  
FRRHGRSVFEFNLLRAAEFTLVFFLPHLVFVRFKVVPAEATRFLRKTINYVMSEREKSGQKRNDLIDIL  
IEFRRSTQLAKASGIKQFVFECDILVAQAVLFFTAGFESSSTMAFAMYELAKDTDVQQLRREEIKDAL  
VESGGQVTLKMIESLEFQMILLEVLRYMPPPLFDRECTSGRDYSLAPFHKKFVVPKGMVYI PCYALH  
MDPQYFPQPRKFLPERFSPENRKLHTPYTYMPFGLPHGCIGERFGYLQAKVGLVNLNRNHMITTERTP  
HRMQLDPKAIITQAKGGIHLRLVRDALGV

>NP\_731751.1 Cyp304a1 [Drosophila melanogaster]

MITETLLTICAAVFLCLSRYAVGRPSGFPPGPPKIPLFGSYLFMLIINFKYLHKAALTLRWYKSDIIG  
LHVGPFPVAVVHSADGVREILNNQVFDGRPQLFVAAMRDPGQDVRGIFFDGPLWKEQRRFILRYLRDFG  
FGRRFDQLELVIQEQLNDMLDLIRNGPKYPHEHEMVKSGGYRVLLPLLFPFSANAHFYIVYNECLSREE  
MGKLVKLCQMGIQFQRNADDYGMKLSIIPWIRHIWPEWSGYNKLNESNLFVRQFFADFVDKYLDSEEGV  
ERNFMDVYIAEMRRPGYGFNRDQLIMGLVDFSPPAFTAIGVQLSLLVQYLMLYPAVLRVQNEIDEVVG  
CGRLPNLEDRKNLPTTEATIREGLRIETLVPSDVPHKALEDTELLGYRIPKDTIVVPSLYAFHSDARIWS

DPEQFRPERFLDADGKLCCLKLDVSLPFGAGKRLCAGETFARNMLFLVTATMCQHDFVGLGPNDRLPDLSQ  
NLNGLIISPPDFWLQLQDRH

>NP\_650003.4 Cyp12e1 [Drosophila melanogaster]

MLSTQWNANKQISRQIYQLCRGLAQKATAVNLEEAKPYADIPGPSKLQLIRAFPLPGGLYKNLPVHEMFLD  
MNRQYGSIFRMPVAVGTDLVLTMNPQDYEVIFRNEGQYPYRRSFEVMDYFKRVHRREVFDGYDGLTSGNG  
PAWGKMRNAVNPILLQPRNAKLYMTNLVQVSDEFLEIRIRIIRDVPVTQEMPDDFAVDIRHLVIESICSVAL  
NTHLGLLGEQRNNKDIQKLVLALQDVVELGFQLDIMPFAWKYLPMPNFKKLMRSLDTITDFCYFHIGNAL  
KRIEEDAKAGTLNEIGLETSLLEKLARFDRQTAVIIAMDLLFAGADPTLVTLGGILFSLSKSPDKQARLL  
EEIRGILPNKDSLSLTIENTMRNLPYLRACIKEGIRMYPGPGTLRRMPHDVVLGSGYRVVAGTDVGIANYQ  
MANMEQFVPKVREFIPERWLRDESNSHLVGETATPFMYLPPFGFGPRSCAGKRIVDMMLEIAISRLVRNFK  
IGFDYPIENAFKAQFFVQPNIPFKFKFIERNE

>NP\_611067.2 Cyp4aa1 [Drosophila melanogaster]

MFVEKVLERTTNLELCSILILLVISLSIYTFYATLNTYLRSVLLSLRLTGPPSLPFLGNCMLVTDKDLMR  
RCAGKAFDLYGSLVRIWVLLFPFFAVLEPEDLQVILSSKKHTNKVFFYRLMHNFLGDGLITSSGSKWSNH  
RRLIQPAFHNNLLEKFIDTFVDASQSLYENLDAEAVGTEINI AKYVNNCVLDILNEAVLGVPIKKGQDV  
AMMEDSPFRQ GKIMPARFTQPWLLLDGIYHWTKMANDELNQQKRLNDFTRKMIQRRRQIQNNNNGNSER  
KCLLDHMI EISESNRDFTEEDIVNEACTFMLAGQDSVGAAVAFTLFLLTQNPECQDRCVLELATIFEDSN  
RAPMTDLHEMRYMEMCIKEALRLYPSVPLIARKLGEEVRLAKHTLPAGSNV FICPYATHRLAHIYPDPE  
KFQPERFSPENSENRHPYAFLPFSAGPRYCIGNRFAIMEIKTIVSRLRSYQLLPVTGKTTIAATFRITL  
RASGGLWVRLKERDHPLIAH

>NP\_610252.3 Cyp6u1, isoform A [Drosophila melanogaster]

MDLMHRTLLTALGALSVVYALVKFSLGYWKRRGILHEKPKFLWGNIKGVVSGKRHAQDALQDIYTAYKGR  
APFVGFYACLKPFILALDLKLVHQIIFTDAGHFTSRGLYSNPSGEPLSHNLLQLDGHKWRSLHAKSAEVF  
TPANMQKLLVRLSQISSRIQRDLGEKSLQ TINISELVGAYNTDVMASMAFGLVGQDNVEFAKWTRNYWAD  
FRMWQAYLALFPLIARLLQYKSYAEPATAYFQKVALSQLQLHRRRDRQPLQTFQLYSNAEKPLTDIEI  
AGQAFGFVLAGLPLNATLAFCLYELARQFEVQDRTRLEINKALEEHGGQVTPDECLRELRYTKQVLNETL  
RLHTPHPFLLRRATKEFEVPGSVFVIKGNVLIPTAAIHMDPGIYENPQRFYPERFEEQARRSRPAAAF  
LPFGDGLRGCIAARFAEQQLLVGLVALLRQHRYAPSAETSIPVEYDNRRLLLMPKSDIKLSVERVDKL

>NP\_523961.1 cytochrome P450-4d8 [Drosophila melanogaster]

MQLMLRLNPKTFIKVGREYVLKFGHLQRVWIFNRLLIMSGDAELNEQLSSQEHLVKHPVYKVLGQWLG  
GLLSDGKVVHQRKIIITPTFHFSILEQFVEVFDQQSNICVQRLAQKANGNTFDVYRSICAAALDIIAET

AMGTKIYAQANESTPYAEAVNECTALLSWRFMSVYLQVELLFTLTHPHLKWRQTQLIRTMQEFTIKVIEK  
RRQALEDDQQSKLMDTADEDVGSKRMMALLDVLMLSTVDGRPLTNDEIREEVDTFMFEGHDTTTSALSFCL  
HELRSRHEVQAKMLEEIVQVLGTDRSRPFVSIRD LGELKYMCEVIKESLRMYPPVPIVGRKLQTD FKYTHS  
VHGDGVI PAGSEIIIGIFGVHRQPETFPNPDEFI PERHENGSRVAPFKMIPFSAGPRNCIGQKFAQLEMK  
MMLAKIVREYELLPMGQRVECIVNIVLRSETGFGQLGMRKRKH

>NP\_652018.1 cytochrome P450-6a17, isoform A [Drosophila melanogaster]  
MLLLALIVVILSLLVFAARRRHGYWQRRGIPHDEVHPLFGNIKDWPNKRHIAEIFRDYFVKYKNSDYPPFA  
GFFFFFFRTRAVVTDMEELLKRVLIKDFNHFENRGVFYNEIDDP LSATLFSIEGQKWRHLRHKLTPFTTSGK  
MKNMFPIVVKVGEEMDKVFRSKTAADRQVLEVVLDLVARYTADVIGNCAFG LNCNSLYDPKAEFV SIGRK  
AITEHRYGNMLDIFLFGFPKLSRRLRLKLN IQEAEDFYTKIVRETIDYRLRTKEKRND FMSLIEMYKNE  
QSGNSEDGLTFNELLAQAFIFFVAGFETSSTTMGFALYELARNQDVQDKLREEIGNVFGKH NKEFTYEGI  
KEMKYLEQVVMETLRKYPVLAHLTRMTD TDFSPEDPKYFI AKGTIVVIPALGIHYDPDIY PEPEIFKPER  
FTDEEIAARPSCTWLPFGE GPRNCIGLRF GMMQTCVGLAYLIRGYKFSVSPETQIPMKIVVKNILISAEN  
GIHLKVEKLAK

>NP\_611004.1 Cyp317a1, isoform A [Drosophila melanogaster]  
MWIIFLIIGLLVLGLLVLLIIAARYQRDYWRYLDIPHERPKKLWPIIRQIMTQTLSTEAMKAEHYS AIYK  
KFKGSGPFCGFYALLQPRALILDRELIRQIMIKDFWNFNDRGLYCNQKSDPLSGDLYALRGESWKEMRQK  
LDPSLEGDRMSLLYDCLYEEAEQ LLLTVNSTLMSQPHSTVHIQKIMRRYVLS SLAKCVFGLNAEQRKTY P  
LEDFEQMTTELALNSHKHGYLMNLM MIRFPNFCRMLRMR RTPKQAE EYFIKLLTSIVEQRETS GKPQKDY L  
QLLIDVKALEFITHQY EADKELGAHLQNELAAHAVVFLKAGYEQTANTLSYVLYELALHP ELQVRVREEV  
KKAIERHDGHITHEGIKSL SFGQVINETLRMHPI TPYILRRTLNDYAVPDHPKYILVKELFLIIP THAI  
HHDPIYDPDEEFKPD RWSGPRDSLQE QGTWFGFGVGARSCIGIQFAQLQLRLALALLLSEYEFSLNTRK  
PLINLEDGIALTLMPLGVIEPGNEERAV

>NP\_608912.1 Cyp28d1 [Drosophila melanogaster]  
MCPISTALFVIAAILALIVF LTNFNSYWKKRGIPTAKSWPFVGSFSPSVFTQKRNVVYDIDEIYEQYKNT  
DSIVGVFQTRIPQLMVTTP EYAHKIYVSDFRSFDNEMAKFTDSKTDPI LANNPFVLTGEAWKERRAEVT  
PGLSANRVKAAYPVSLRVCKKFVEYIRRQSLMAPAQGLNAKDLCLCYTTEVISDCVLGISAQSFTDNPTP  
MVGMTKRVF EQSFGFIFYTVVANLWPPITK FYSVSLFAKDVA AFFYDLMQKCIQVRRES PAAQQRDDFLN  
YMLQLQEKKGLNAAELT SHTMTFLTDGFETTAQVLTHLTLFLARNPK EQMKLREEIGTAE LTFEQISELP  
FTEACIHETLRIFSPVLAARKVVTEPC ELTNKNGVSVKLRPGDVVIIPVNALHHD PQYYE EPQSFKPERF  
LNINGGAKKYRDQGLFFGFGDPRICPGMRFSLTQIKAALVEIVRNFDIKVNPKTRKDNEIDDTYFMPAL  
KGGVWLD FVERN

>NP\_608403.1 Cyp6v1, isoform A [Drosophila melanogaster]

MVYSTNILLAIVTILTGVFIWSRRTYVYWQRRRVKVFVQPTHLLGNLSRVLRLEESFALQLRRFYFDERFR  
NEPVVGIYLFHQPALLIRDLQLVRTVLVEDFVSFSNRFAKCDGRSDKMGALSFLAKQPEWREIRTRLAP  
AFAGAKLKQMFSLMEEIGCDLEWYLKRLTRDLRRGDAERGAIVSIKDVCDLYNTDMIASIAFGLRSYSLR  
NTQSEIGSHCQDLFRPNVRIIDLFIYFVLPKLVPLLRPKLFTEPHAEFLRRVIQLVIEERERGGDLRND  
LIEMLTLTKKEADLQDKSHFTHHRDFLAAQAASFEVAGIETCSASMSFALYELAKQPLMQSRLREIRE  
AFASNPNGRLTYEAVARMEFLDMVVEETLRKYPIVPLLERECTPINKKRFYSLRPHAECYTRRGMPVFIS  
NLAIHHPKYWPDPRDFPERFSAANKALQAPMSYMPFGAGPRNCIGMQIGLLQIKLGLVYFLHQHVEI  
CDRTVERIQFDAKFALLASEQRIYLVKVDCL

>NP\_525043.1 cytochrome P450-4d2, isoform A [Drosophila melanogaster]

MLGVVGVLLLVAFATLLLDLWDFLWRRRNGILPGPRPLPFLGNLLMYRGLDPEQIMDFVKKNQKRYGRLYR  
VWILHQAVFSTDPRIEFVLSSQQHITKNNLYKLLNCWLGDGLLMSTGRKWHGRRKIITPTFFHKILEQ  
FVEIFDQQSAVMVEQLQSRADGMTPIINIFPVICLTALDIAETAMGTKINAQKNPNLPYVQAVNDVTNIL  
IKRFIHAWQRVDWIFRLTQPTEAKRQDKAIKVMHDFTENIIRERRETLVNNSKETTPEEEVNFLGQKRRM  
ALLDVLQSTIDGAPLSDDEDIREEVDTFMFEGHDTTTSAISFCLEYEISRHPVQQRLQOEIRDVLGEDRK  
SPVTLRDLGELKFMENVIKESLRLHPPVPMIGRWFAEDVEIRGKHIPAGTNFTMGIFVLLRDPEYFESPD  
EFRPERFDADVPQIHPYAYIPFSAGPRNCIGQKFAMLEMKSTVSKLLRHFELLPLGPEPRHSMNIVLRSA  
NGVHLGLKPRA

>NP\_525031.1 cytochrome P450-4g1 [Drosophila melanogaster]

MAVEVVQETLQQAASSSTTVLGFSPMLTTLVGTLMALYEYWRNSREYRMVANIPSPPELPILGQAH  
VAAGLSNAEILAVGLGYLNKYGETMKAWLGNVLLVFLTNPSDIELILSGHQHLTKAEYRYFKPWFGDGL  
LISNGHHWRHHRKMIAPTFFHQSILKSFVPTFVDHSAVARMGLEAGKSFVDVHDYMSQTTVDILLSTAMG  
VKKLPEGNKSFEYAQAVVDMCDIIHKRQVKLLYRLDSIYKFTKLREKGRMMNIIILGMTSKVVKDRKENF  
QESRAIVEEISTPVASTPASKKEGLRDDDDIDENDVGAKRRLALLDAMVEMAKNPDIEWNEKDIMDEV  
NTIMFEGHDTTSAGSSFALCMMGIHKDIQAKVFAEQKAIFGDNMLRDCTFADTMEMKYLERVILETLRLY  
PPVPLIARRLDYDLKLAGPYTPVKGTTVIVLQYCVHRRPDIYPNPTKFDPDNFLPERMANRHYYSFIPF  
SAGPRSCVGRKYAMLKLVLLSTIVRNYIVHSTDTEADFKLQADIILKLENGFNVSLEKRQYATVA

>NP\_524828.1 cytochrome P450-4p1 [Drosophila melanogaster]

MIIWLILALSALLYWLHRANKDYHILSFFTKRIRLKDGTPEIIAPIAKGKTIFGNTLDLYGRDHAGVF  
NYSRERAKEMGTSYIEYVFGKAIYNIIDADSAENVLNHPNLITKGLVYNFLHPFLRTGLLTSTGKKWHAR  
RKMLTPTFFHFNILNQFQEIFKTESQKFLQFEGQDEVTTILHDVIPRFTLNSICETAMGVKLDMAEKGD



RYRENFSQIEECFIRRLSNPLLWGDKLFEMFAAKDFASALDVVHRFSSEIIAKRRDLLKDELDKSSSTAD  
DDGFVSKKRFAMLDTLIYAEKDGLIDHIGICEEVDTLMFEGYDTTSSIGLIFGLMNMSLNPDKQELCYQEI  
QEHIDDDLNLDVQGQNLKLYEYFMKETTRLFPSPVIMGREAVQETELANGLILPKGAQITIHVFDIHR  
NAKYWDSPEEFRPERFLPENVDQRHTYAYVPPSAGQRNCIGKKYAMQEMKTLMVVLLKQFKVLKAIDPQK  
IVFHTGITLRTQDKIRVKLVRRRT

>NP\_524598.1 cytochrome P450-4c3 [Drosophila melanogaster]

MSSKVITSLMAESILLSKVGQVISGYSPIVFLGSGILIFLVVYNKRRSRLVKYIEKIPGPAAMPFLGNA  
IEMNVDHDELFNRVIGMQKLWGTRIGINRVWQGTAPRVLLFEPETVEPIILNSQKQFVNKSHDYDYLHPWL  
EGLLTSTDRKWHRRKILTPAFHFKILDDFIDVFNEQSAVLARKLAVEVGSEAFNLFPPYVTLCTLDIVCE  
TAMGRRIYAQSNSESEYKAVYIGISIVQSRQAKIWLQSDIFISLTAEYKLHQSINTLHGFSNMVIRER  
KAELAILQENNNNNNNNAPDAYDDVGKKKRLAFLDLLIDASKEGTVLSNEDIREEVDTFMFEGHDTTSA  
ISWTLFLLGCHPEYQERVVEELDSIFGDDKETPATMKNLMDMRYLECCIKDSLRLFPSPMMARMVGEDV  
NIGGKIVPAGTQAIIMTYALHRNPRVFPKPEQFNPDNFPENCAGRHPFAYIPFSAGPRNCIGQKFAILE  
EKAVISTVLRKYKIEAVDRREDLTLGELILRPKDGLRVKITPRD

>NP\_523646.1 cytochrome P450-9b2 [Drosophila melanogaster]

MALIEICLALVVIGYLIYKWSTATFKTFEERKLYFEKPYPFVGNMAAAALQKSSFQRQLTEFYERTRQHK  
LVGFFNMRTPMITLNDPELIKVKVCVDFDHFPHQPFITSNDRFLNDMLSVMRDQRWKHMRNTLTPVFTA  
AKMRNMFITLMNESFAECLQHLDSSTKLPGRKGFVDMKVMCNKLSNDIIATTAFLKVNYSYDNPKNEFY  
EIGQSLVFSRGLQFFKMLSTLVPKLFSLKLTIFDSAKVDYFARLVVEAMQYREKHNI TRPDMIQLLME  
AKNESEDKWTDEIVAQCFFFAAFENNSNLICTTTTYELLYNPDVQERLYEEIVETKKALNGAPLTYDA  
VQKMTYMDMVISLRSKWTLAAATDRLCSKDYTLTDDGTKLDFDKVGDRIINIPISGLHLDDRYFPEPRK  
FDPDRFSEERKGMVPTYLPFGVGPNCIGNRYALMQVKGMLFNLLLHYKIEASPRTIKDLWGSASGFN  
FTPRSGFWMHLVPRK

>NP\_611370.2 Cyp12b2 [Drosophila melanogaster]

MWKYSNKIIYRNVSGNLWFNRSVGGTLSQQTQLELADSRIDEKWQQARSFGEIPGPSLLRMLSFMP  
GGALRNTNLIQMNRLMREMYGDIYICIPGMMGKPNVFTYNPDDFEMTYRNEGVPPIRIGLESNYYRKIH  
RPDVFKGVGGLASDQGEWADIRNKVNPVLMKVQNVQRNLPQLDQISKEFIDKLETQRNPETHLTTFDFH  
NQLKMWAFESISFVALNTRMGLLSDNPDNADRLAKHMRDFFNYSFQFDVQPSIWTIFYKTAGFKKFLKTY  
DNITDITSNYIETAMRGFGKNDGKTKCVLEQLLEHNKVAVTMVMMDLMAGIDTSSACLTILYHLARN  
PSKQEKLRRELLRILPTTKDSLTDQNTKNMPYLRAKIEGLRITSITPGNFRITPKDLVLSGYQVPRGTG  
VLMGVLELSNDDKYFAQSSEFIPERWLKSDLAPDIQACPAARTRNPFVYLPFGFGPRTCIGKRIAELEIE  
TLLVRLRLRSYKVSWLPETPIEYESTIILSPCGDIRFKLEPVGDLM

>NP\_608689.2 Cyp309a2 [Drosophila melanogaster]

MMPERFSFDFRPIDQYWTRAKGACSNTRKGNMYILASLALILLHLLVLPYLYLTWHHKYWRKRGLVTAR  
PLTLLGTYPGLLTRKSNLVFDVQKIYDKYKKGKRAVGVFVTRQPQILVLDPELAHEVLVSNFRCYKDSLQ  
SSYL RHAKWDKYARLNPFWASGQSWRRLRTDAQAGISGSRLRQAYNIWEQGGQMLTEYMTQQVAEKNNIL  
ETRDLCFRYTAHVMAFDIWGIDAGTLTRPMEQPNKVQEMASKWTSYAFYMLTLMATIVAPCSRLLLRFR  
FYPKETDEFFSNLTKESIELRLKAGDSTRDYLSHLLQLRDQKQATHDDLVGHALTVMLDGYDTSGTALL  
HALYYLAENPAVQQKLRVEILSCMASEKSLDFEKLSSLYLEQVIYESLRSSLI PQYTKVCTLPTVIRL  
SESKSLDVEVGMTIMI PNYQFHDKQYFPEPEAFKPERFDNGAYQELMRKGI FL PFS DGP RICMGVPLAM  
LTLKSALVHILSNFQVVRGRDRLIPKGD SGFGVVLQGDVNLE YRRFFR

>NP\_572780.3 Cyp311a1 [Drosophila melanogaster]

MALWPLLLITLTIWILVRKWTLLRLGSSLPGPWAFPLLGNAQMVGKLRPEYIFLVFTELRDRFGATYRLR  
LGPQLWVFLHSAEETRQALHDPTLRKADTFMQLEPLIGNGLLISHGAHWTRQRLLTPAFQPQLLRSFAP  
AIGGHVERLVGRLGATRGAFLEVTEPLFACLLDAIVDTSMGAQLDTQSV DHP I IQAFHLSKLLFKRMI  
NPLLSSDWIFQRTQLWRDLDEQLQVIHSQMESVIEKRAKELLDMGEPAGRAHNLLDTLLLAKFEGQSLSR  
REIRDEINTFV FAGVDTTAAMSFVLYALAKFPETQTRLRKELQDVALDETTDL DALNGLPYLEALIKEV  
LRLYTIVPTTGRQTTQSTEIGGRTYCAGVTLWINMYGLAHDKEYYPDPYAFKPERWLPEDGAVAPPAFSY  
IPFSGGPHVCIGRRYSLLMKLLTARLVREFQMELSPEQAPLRLEAQMV LKAQQGINVSFLKQ

>NP\_647975.2 spook, isoform A [Drosophila melanogaster]

MLAALIYITILAILLSVLATSYICIIYGVKRRVLQPVKTKNSTEINHAYQKYTQAPGPRPWP IIGNLHLL  
DRYRDS PFAGFTALAAQQY GDIYSLTFGHTRCLVNNLELIREVLNQNKGVM SGRPDFIRYHKLFGGERSN  
SLALCDWSQLQQKRRNLARRHCS PREFSCFYMKMSQIGCEEMEHWNRELGNQLVPGE PINIKPLILKACA  
NMFSQYMC SLRFDYDDVDFQQIVQYFDEIFWEINQGHPLDFLPWLYPFYQRHLNKI INWSSTIRGFIMER  
IIRHRELSVDLDEPDRDFTDALLKSLEDDKDVSRNTIIFMLEDFIGGHS AVGNLVMLVLA IAKNVDIGR  
RIQEEIDAIIEEENRSINLLDMNAMPYTMATIFEVLRYS SSPIVPHVATEDTVISGYGVTGKTIVFINNY  
VLNTSEKFWVNPKEFNPLRFLEPSKEQSPKNSKGS DSGIESDNEKLQLKRNI PHFLPFSIGKRTCIGQNL  
VRGFGFLVVVNMQRYNIS SHNPSTIKISPESLALPADCFPLVLT PREKIGPL

>NP\_523749.2 cytochrome P450-6a8 [Drosophila melanogaster]

MALTYILFQVAVALAILTYIHRKLT YFKRRGIPFVAPHLIRGNMEELQKT KNIHEIFQDHYNKFRESK  
APFVGFFFFQSPA AFVIDLELAKQILIKDFS NFSNKGIFYNEKDDPISAHFNLDGAQWRLLRNKLSSTF  
TSGKMKLMPYPTVVS VANEFMTVMHEKVPKNSVLEIRDLVARFTVDVIGTCAFGIQCNSLRDEKAEFLYFG  
KRSLVDRKHGTLN GFMRSYPKLARKLGMVRTAPHIQEFYSRIVTETVAVREKEHIKRNFMDMLIELKN

QKEMTLENGDVVRGLTMEEVLAQAFVFFIAGFETSSSTMGFALYELAKNPDIQDKVRAEVVEVIEQHDQN  
FTYECKDLKYLNVLDLRLTYTIVPNLDRMAAKRYVVPGHPNFVIEAGQSVIIPSSAIHHDPSIYPEP  
FEFRPERFSPEESAGRPSVAWLPGDGPNCIGLRFQMQARIGLALLIRNFKFSTCSKTPNPLVYDPKS  
FVLGVKDGIIYLVKQVETV

>NP\_724937.1 Cyp49a1, isoform C [Drosophila melanogaster]

MELRPSMPSLRHYKGLRRDFFGDVAGLIGVHGPKWEAFRQEVQHILLQPQTAKKYIIPPLNDIASEFMGR  
IELMRDEKDEL PANFLHELYKWALESVGRVSLDTRLGCLSPGSEEAQQIIEAINTFFWAVPELELRMPL  
WRIYPTKAYRSFVKALDQFTAICMKNIGKTMKADADEARGLSKSEADISIVERIVRKTGNRKLAILAL  
DLFLVGVDTTSVAASSTIYQLAKNPKQKFLDELQKVFPHREADINQNVLEQMPYLRACVKETLRMRPV  
VIANGRSLQSDAVINGYHVPGKTHVIFPHLVVSNPDYFPEPKRFLPERWLKQSTDAAGCPHANQKIHPF  
VSLPFGFGRRMCVGRRAEIELHTLLAKIFRKYKVSYNSGEFVYRVNSTYIPQSPLNFKLTLRDE

>NP\_573003.2 Cyp4s3 [Drosophila melanogaster]

MSTLALVAVFLWAAFLRYLPKILNFLRLQRFAKTLPGPTIGELIANVKKGEILNWLKELREKHGPFVRIW  
FGKDLMMVFTDPEDIKQLLGNQLLTKSRNYELLEPWLGKLLTNGGESWHRRRKLLTPGFHFRILSEFK  
EPMEENCRILVRRRLRTKANGESFDIYPYITLFDALDAICETAMGIKKHAQLQSDSEYVQAVQSI CRVMHKQ  
SFSFWQRLNVFFKHTKPGKEREAAKVLHDETNRVIRLRREQLIQERNEWKPEAEQDDVGAKRRLAFLDM  
LLLTQMEGGAELSDTDIREEVDTFMFEGHDTSSAIAFALSLLSKNPDVQQRAFEEASELEGREKESMPY  
LEAVIKETLRIYPSVPPFSRKVLEDELVGKLTVPKGASISCLIIYMLHRDPKNFPDPERFDPDRFLVNEKQ  
MHPFAFAAFSAGPRNCIGQKFAMLELKTSLAMLLRSYRFLPKDKHQPKPLAELVTKSGNGIRLRILPRDE  
NGTTA

>NP\_727590.1 Cyp318a1 [Drosophila melanogaster]

MHLNIALWACGALLAVLLAWQRKRCWRLIWQLNGWRGVIQQPVLWLLLCINLHPNSILEKVSQYRVHFQR  
PLAVLVGTRVLLYIDDPAGMECVLNAPECLDKTFLQDGGFVRRGLLHARGQKWKLRKQLNPAFVSHNIVA  
SFFDVFNSVGNQMVQFQQTQTNLHGQAVKFTAEDLLSRAVLEVSCLTIMGTPTNFTQLDDAHIAHSYKR  
LLEISAVRVVVKPWLQIRLLHRLLAPELYEESKCKAKLLEDFVGGIVRTKHRNWRLRDAVGGEKSGEDASN  
GWQRRIFIEQIFQLAANGEMTLEEIMDEAQMVLVVSFETVSNSIMLALLCLATNKGDCQRLLAEIRALV  
PDVGQVGLQQLRLYLDAFVSESLRLLATVPMNLRHVSDFRDLRQAGHETIVPQNSIVVLDTFNMQRDE  
RWWGANARQFDPQRFLDQEEEQLSKGHNDSSGSEKRRQRDRRHSYSFLPFSNGLRSCIGRRYGLFIMKVF  
LVKLI TNDFQSDFELEKLFQFVENISLKFKNADDILLTIQPKKEST

>NP\_477117.2 cytochrome P450-4e2, isoform A [Drosophila melanogaster]

MWFVLYIFLALPLLLVAYLELSTFRRRRVLNKFNPRGLPLMGNAHQMGKNPSEILDTVFSWWHQYKGDN

FVFWIGTYSNVLVTSKYLEFILSSQTLITKSDIYQLTHPWLGLGLLTSTGSKWHKHKRKMITPAFHFNIL  
QDFHEVMNENSTKFIKHLKTVAAGDNIFDFQEQAHYLTLDVICDTAMGV SINAMENRSSSIVQAFKDMCY  
NINMRAFHPKRNELLYRLAPDY PAYSRTLKTLQDFTNEIIAKRIEAHKS GAVSTNAGDEFTRKKMAFLD  
TLLSSTIDGRPLNSKELYEEVSTFMFEGHDTTTTSGVSAFVYLLSRHQDEQRKLFKEQREVMGNSSELGRDA  
TFQEISQMKYLDLFIKEAQRVYPSVPIGRFTEKDVIDGDVLPKGTTLNLGLVMLGYNEKVFKDPHKFR  
PERFELEKPGPFYVPPSAGPRNCIGQKFALLEIKTVVSKIIRNFEVLPALDELVSKDGYISTTIGLPDA  
ERKKRDPYRHKYDPILSAVLTLSKSENGLYIRLKERH

>NP\_650368.1 Cyp313a1 [Drosophila melanogaster]

MLTINLLLAVGALFWIYFLWSRRRLYFLMLKIPGPIGLPILGSSLENIITYKRKLSFRTKYLNKYGSTIL  
TWMGPVPPFIVTRDPKVVEDIFSSPDCHNKSQHIVNAITSCMGNGLLGKQDPHWLDRRKHFNPSFKQDLLL  
SFFHIFDAETKVLNLLDITYVDKGEIDVVPPEMLRWSFKIAAQTTMGSEVKHDEHFKNGLVESFESLISH  
STLNILMPLVQNRMISKICGYDKLRADNFSRIQKMLDNVNVNKKVNPLPKTSDSDPESNIVINRAMELYRKG  
DITYMDVKSECCIMIAAGYDTSALTVYHALFLLANHPEHQEAVFEELNGVFPDAGHFGITYPDMQKLDYL  
ERVIKETLRLIPAIPITARETKNDVRLSNGVLI PKGVVIGIDMFHTHRNP EVWGPADNFPDNFLAENM  
EQKHPYAYIPFARGKRNCIGSKYAMSSKFALCRILRNYKISTSTLYKDLVYVDNMTMKLAEYPRLLKLR  
RG

>NP\_650327.1 Cyp6d5 [Drosophila melanogaster]

MIGIYLLIAAVTLLYVYLKWTFSYWDRKGF PSTGVSIPFGALESVTKGKRSFGMAIYDMYKSTKEPVI GL  
YLTLRPALLVRDAQLAHDV LVKDFASFHDRGVYVDEKNDPMSASLFQMEGASWRALRNKLTPTSFTSGK LK  
AMFETSDSVGDKLVDSIRKQLPANGAKELELKKLMATY AIDI IATTIFGLDVSFADPNNEFQIISKV N  
RNNIEDIIRGTSSFLYPGLEKFFVKIGWKQEATERMRELSNR TVDLREQNNIVRKDLLQLLLQLRNQGI  
NTDDNIWSAESTKNGVKMSKDLIAGQLFLFYVAGYETTASTTSFTLYELTQNPEVMEKAKEDVRS AIEK  
HGGKLT YDAISDMKYLEACILETARKYPALPLLNRICTKDY PVPDSKLVIQKGTPIIISLIGMHRDEEYF  
PDPLAYKPERYLENGKDYTQAAYLPFGE GPRMCIGARMGKVNKIAIAKVL SNFDLEIRKEKCEIEFGVY  
GIPLMPKSGVPVRLSLKK

>NP\_651563.1 Cyp6a18, isoform A [Drosophila melanogaster]

MQLTYFLFQVAVALLAIVTYILHRKLT YFKRRGIPYDKPHPLRGNMEGYKTRTVHEIHQEY YNKYRNSK  
APFVGFYLFQKPAAFVIDLELAKQILIKNFSNFTDKGIYNEKDDPMSAHLFNLDG PQWRLLRSKLSSTF  
TSGMKMFMYPTVVSVAEEFMAVMHEKVSSENSILDVRDLVARFTVDVIGTCAFGIKNSLRDEKAEFLHFG  
RRALLDSRHGNLV SGLMRSYPNLARRLGLCRNTAQIQEFYQRIVKETVTLREKENIKRND FMDMLIGLKN  
QKNMTLENGEVVKGLTMEIVAQAFVFFIAGFDTSSSTMGFALYELAKNPSIQDKVRAELGQVLEQHDQK  
FTYECIKDLKYLDQVINETLRHYTIVPNVDRVA AKRFVVPGNPKFVIEAGQSVIIPSSAIHHDPSIYPEP

NEFRPERFSPEESAKRPSVAWLPGEGPRNCIGLRFQMQARIGLAMLIKNTFSPCSATPDPLTFDPHS  
AILLGIKGGIQLKVEAI

>NP\_650189.1 Cyp9f2 [Drosophila melanogaster]

MLWEFFALFAIAAALFYRWASANNDFFKDRGIAYEKPVLYFGNMAGMFLRKRAMFDIVCDLYTKGGSKKF  
FGIFEQRQPLLMVRDPDLIKQITIKDFDHFINHRNVFATSSDDDPHMSNLFGSSLFMRDARWKDMRST  
LSPAFTGSKMRQMFQLMNQVAKEAVDCLKQDDSRVQENELDMKDYCTRFTNDVIASTAFGLQVNSFKDRE  
NTFYQMGGKLTFTFLQSMKFMFLFALKGLNKILKVELFDRKSTQYFVRLVLDAMKYRQEHNIVRPDMIN  
MLMEARGIIQTEKTKASAVREWSDRDIVAQCFVFFFAGFETSAVLMCFTAHELMENQDVQQRLYEVEVQV  
DQDLEGKELTYEAIMGMKYLDQVVNEVLRKWPAAIAVDRECNKDITFDVDGQKVEVKGDVWLPTCGFH  
RDPKYFENPMKFDPERFSDENKESIQPFTYFPFGLGQRNCIGSRFALLEAKAVIYYLLKDYRFAPAKKSC  
IPLELITSGFQLSPKGGFWIKLVQRN

>NP\_651082.1 Cyp6d4 [Drosophila melanogaster]

MFLSILLAVTLLTLAWFYLRHYEYWERRGFPFEKHSGIPFGCLDSVWRQEKSMGLAIYDVYVSKSERVL  
GIYLLFRPAVLIRDADLARRVLAQDFASFHDRGVYVDEERDPLSANIFSLRQSWRSMRHMLSPCFTSGK  
LKSMTSSEDIGDKMVAHLQKELPEEGFKEVDIKKVMQNYAIDIIASTIFGLDVNSFENPDNKFRKLVSL  
ARANNRFNAMFGMMIFLVPSIAQFLFRIGFKNPVGLAMLQIVKETVEYREKHGIVRKDLLQLLIQLRNTG  
KIDENDEKSFSIQKTPDGHIKTISLEAITAQAFIFYIAGQETTGSTAAFTIYELAQYPELLKRLQDEVDE  
TLAKNDGKITYDSLKMEFLDLQVQETIRKYPGLPILNRECTQDYTPDTHVPIPKGTPVVISLYGIHHD  
AEYFPDPETYDPERFSEESRNYNPTAFMPFEGGPRICIAQRMGRINSKLAIKILQNFNVEVMSRSEIEF  
ENSGIALIPKHGVRVRLSKRVPKLS

>NP\_652020.1 Cyp4d14, isoform A [Drosophila melanogaster]

MYLELFAILLATALAWDYMRKRRHNKMYAEAGIRGPKSYPLVGNAPLLINESPKTIFDMQFRLIAEFGKN  
IKTQMLGESGFMTADSKMIEAIMSSQQTIQKNNLYSLVNWLGDGLLISQGKKWFRRKIITPAFHFKIL  
EDFVEVFDQQSATMVQKLYDRADGKTVINMFPVACLAMDIAETAMGVKINAQLQPQFTYVQSVTTASA  
MLAERFMNPLQRLDFTMKLFYPKLLDKLNDVAVKMHDFDNSVITERRELLQKAIADGGDADAALLNDVGQ  
KRRMALLDVLLKSTIDGAPLSNDDIREEVDTFMFEGHDTTSSIAFTCYLLARHPEVQARVFQEVDRVIG  
DDKSAPVTMKLGLGELYECVIKESLRLFPSPVPIIGRYISQDTVLDGKLIPADSNVILIYHAQRDPDYF  
PDPEKFI PDRFSMERKGEISPFAYTPFSAGPRNCIGQKFAMLEMKSTISKMVRHFELPLGEEVQPVNLV  
ILRSTTGINCGLKPRVY

>NP\_610473.1 Cyp4p3 [Drosophila melanogaster]

MLLILWLVGAFIVLIQWIYRLNRDYCILGFFAKRIRTKNGQNPEIAPLVKGSTIFANSFDLYGKDHSGVF

EHSRDCAKKLGKSYAEYAMGTAIYNVIDADSAERVLNDPNLINKGTIYDFLHPFLRTGLLTSTGKKWHAR  
RKMLSPTFFHFNILNQFQEIFITESLKFLEQFKGNDEAIISLNEVIPRFTLNSICETAMGVKLDMAEKGD  
RYRENFRQIEECFIRMSNPLLWSDTLFKMFAEKDYASALDVVHGFSSEIIAKRRDQLNDEIDSRGNTQT  
AEDELFTSKRRFAMLDTLILA EKDGLIDHIGICEEVDTLMFEGYDTSIGLMFGLMNMSLYPEEQEKCYQ  
EIQANIDDELNILNIGQLNKLKNLEYFIKETMRLFPSVPAMGRETTRETELSNGLILPKGSQIFVHVFDI  
HRNPEYWDSPEEFRPERFLPENSQNRHTYAYIPFSAGQRNCIGQKFAMQEMKTLMVALLKQFQILPEIDP  
KTIVFQTGLTLRTKNQIHVKLVRRK

>NP\_609891.1 Cyp310a1 [Drosophila melanogaster]

MWLLLPILLYSAVFLSVRHIYSHWRRRGFPSEKAGITWSFLQKAYRREFRHVEAICEAYQSGKDRLLGIY  
CFFRPVLLVRNVELAQTILQQSNGHFSELKWDYISGYRRENLEKLAPMFGTKRLSEMFGVQKVGDLHI  
HLLDRQGQGCPEVDIQQKLRVYSVNI IANLIYGLDINNFEHEDHILTSYLSHSQASIQSFTLGRLPQK  
SSYTYRLRDLIKQSVELREDHGLIRKDILQLLVRFRNGNEVSGDKWQLEPINDADKLLSIKRLAKVAEDL  
LKVSLDAVASTVTFLLLEILQEPLIVEKLRRAEIKELSNENGQLKFEELNGLRYMDMCLKETLRKYPPLPI  
IERVCRKSYSLPNSKFTIDEGKTLMVPLLAMHRDEKYFSEPMKYKPLRFLQTANDVGQCEDKTKSNVFIG  
FGIGGSQCVCQNFQAKLVIKVALIKLLQNFHLELDANQVKT LKVSHRPAPFIHTKDGLKVKLKRREINTKFI  
YS

>NP\_609694.1 Cyp28a5 [Drosophila melanogaster]

MVLITLTLVSLVVGLLYAVLVWNYDYWRKRGVPGPKKLLCGNYPNMFMTMKRHAIYDLDDIYRQYKNKYD  
AVGIFGSRSPQLLVINPALARRVFSNFKNFHDNEIAKNIDEKTDFFIFANNPFSLTGEKWKTRRADVTPG  
LTMGRIKTVYPVTNKVCQKLEWVEKQLRLGSKDGDIDAKHMSLCFTTEMVTDCVLGLGAESFSDKPTPIM  
SKINDLFNQPWTFVLFFILTSFPSSLHLIKLRFVPDVERFFVDLMGSAVETTRAQLAAGKQFERSDFL  
DYILQLGEKRNLDNRQLLAYSMTFLLDGFETTATVLAHILLNLGRNKEAQNLLREEIRSHLQDGTIAFEK  
LSDLPLYLDACVQETIRLFPFPGFMSNKLCTESIEIPNKEGPNFVVEKGTTVVPHYCFMLDEEFFPNPQSF  
QPERFLEPDAAKTFRERGVFMFGDGRVCIGMRFATVQIKAAIVELISKFNVKINDKTRKDNDYEPGQI  
ITGLRGGIWLDEKL

>NP\_608916.1 Cyp4ac1 [Drosophila melanogaster]

MWIALLGIPILLAVLTLKHKINKTYFILSLTKRVTEDEGSPLESKVAIMP GKTRFGNNLDILNFTPASV  
FNFVRESTAKAKGQNYLWYFLYAPMYNVVRPEEAEEVFQSTKLITKNVYELIRPFLGDGLLISTDHKWH  
SRRKALTPAFHFVNLQSLFGIFKEECKKFLNVLEKNLDAELELNQVIPPFTLNNICETALGVKLDMMSE  
NEYRKAIHAIEEVLIQRVCNPLMYYNWYFFVYGDYRKHLQNLRIVHDFSSRIIERKRQQFQQKQLGEVDE  
FGRKQRYAMLDTLLAAEADGQIDHQICDEVNTFMFEGYDTSSTCLIFTLLMLALHEDVQKKCYEEVENL  
PEDSDDISMFOFNKLVYLECVIKESLRMFPSVFFIGRQCVEETVNVGMVMPKDTQISIHIDIMRDPHF

PKPDLFQPDRLPENTVNRHPFAYVPPFSAGQRNCIGQKFAILEMKVLLAAVIRNFKLLPATQLEDLTFEN  
GIVLRTQENIKVKLSKRVK

>NP\_608911.1 Cyp28d2 [Drosophila melanogaster]

MCPVTTFLVLVLTLLVLVYVFLTWNFNYWRKRGIKTAPTWPFFVGSFPSIFTRKRNIAYDIDDIYEKYKDT  
DNMVGVFTRVLPQLLMCEPEYIHKIYATDFRSFHNNEWRFVFNKKTDMILGNNPFVLTGDEWKERRSEIM  
PALSNNRVKAVYPVSVQVCKKFEYIRRQQMATSEGLDAMDLSLCYTTEVVSDCGLGVSASQFTDTPTP  
LLKMIKRVFNTSFEFIFYSVVTNLWQVKRFYSVPPFNKETEVFFLDIIRRCITLRLEKPEQQRDDFLNY  
MLQLQEKKGLHTDNILINTMTFILDGFETTALVLAHIMLMGRNPEEQDKVRKEIGSADLTFDQMSSELP  
LDACIYETLRLFSQPVAARKLVTEPFEFANKNGRTVHLKPGDVVTIPVKALHHDPPQYEDPLTFKPERFL  
ESNGGGMKSYRDRGVYLAFGDGPRHCPGMRFALTQLKAALVEILRNFEIKVNPKTRSDNQIDDTFFMATL  
KGGIYLDKDL

>NP\_608457.1 Cyp6t1 [Drosophila melanogaster]

MIAVFSLIAAALAVGSLVLLPVVLRGGCLLVVTIVWLWQILHFHWRRRLGVPFVPAAPFVGNVWNLRLGA  
CCFGDQFRELYESKEAAGRAVFGIDVLHNNHALLRDPALIKRIMVEDFAQFSSRFETTDPTCDTMSQNL  
FFSKYETWRETHKIFAPFFAAGKVRNMYGLENIGQKLEEHMEQKLSGRDSMELEVQKLCALFTTDIIAS  
LAFGIEAHSIQNPEAEFRMCIEVNDPRPKRLLHLFTMFFFRLSHRVGTHLYSEEYERFMRKSMDYVLS  
QRAESGENRHLDLIDIFLQKRTEPAESIHRPDDFAAQAFLLLAGFDTSSTITFALYELAKNTTIQDR  
LRTELRAALQSSQDRQLSCDVTGLVYLRQVVDEVLRLYPPTAFLDRCCNSRTGYDLSPWNGGSPFKLRA  
GTPVYISVLGIHRDAQYWPNEVDFPERFSAEQRQHHMPMTYLPFGAGPRGCIGTLLGQLEIKVGLLHIL  
NHRVEVCERTLPEMRFDPKAFVLTAHNGTYLRFVKNLS

>NP\_572721.1 Cyp4g15, isoform A [Drosophila melanogaster]

MEVLKKAALGSPSSVFYFLLLPTLVWYIYWRLSRAHLYRLAGRLPGPRGLPIVGHFLFDVIGPASSVFR  
TVIRKSAPFEHIAKMWIGPKLVVFIYDPRDVELLSHVYIDKASEYKFFKPWLGDLLISTGQKWRSHR  
KLIAPTFFHLNVLKSFIELFNENSRNVVRKLAEDGRTFDCHDYMSEATVEILLETAMGVSKKTQDKSGFE  
YAMAVMRMCDILHARHSIFLRNEFVFTLTRYYYKEQGRLNIIHGLTTKVIKSKAAFEQGTGSLAQCE  
LKAAALEREEREQNGGVDQTPSTAGSDEKREKDEKASPVAGLSYQSAGLKDDLDVEDNDIGEKKRLAF  
LDLMLESAQNGALITDTEIKEQVDTIMFEGHDTAAGSSFFLSLMGIHQDIQDRVLAELDSIFGDSQRPA  
TFQDTLEMKYLERCLMETLRMYPPVPLIARELQEDLKLNSGNVIIPRGATVTVATVLLHRNPKVYANPNV  
FDPDNFLPERQANRHYAFVPPFSAGPRSCVGRKYAMLKILKILLSTILRNRYVSDLTESDFKLQADIILK  
REEGFRVRLQPRTS

>NP\_524771.1 cytochrome P450-4e1 [Drosophila melanogaster]

MWIVLCAFLALPLFLVITYFELGLLRRKRMLNKFQGPSMLPLVGNAHQMGNTPTTEILNRFFGWWEYKDN  
FRYWIGYYSNIMVTNPKYMEFILSSQTLISKSDVYDLTHPWLGLGLLTSTGSKWHKHKRMITPAFHFNII  
QDFHEVMNENSTKFIDQLKKVADGGNIFDFQEEAHYLTLDVICDTAMGVSINAMENRSSSVVQAFKDITY  
TIKMRAFSPWKRNYLFHFAPEYPEYSKTLKTLQDFTNEIIAKRIEVRKSGLEVGKADFEFSRKKMAFLD  
TLLSSKVDGRPLTSQELYEEVSTFMFEGHDTTTTSGVGFVYLLSRHPDEQEKLFEQCDVMGASGLGRDA  
TFQEISTMKHLDLFIKEAQRLYPSVPPFIGRFTEKDYVIDGDIVPKGTTLNLGLLMLGYNDRVFKDPHKFQ  
PERFDREKPGPFYVPPSAGPRNCIGQKFALEIKTVVSKIIRNFEVLPALDELVSKDGYISTTLGLQPA  
EKKSRAHNNHYDPILSASMTLKSENGLHLRMKQRLVCDST

>NP\_523850.1 cytochrome P450-9c1 [Drosophila melanogaster]

MVFVELSIFVAFIGLLLYKWSVYTFGYFSKRQVAHEKPIPLGNIPWSVLMGKESYIKHSIDLHLRLKQH  
KVYGVFNLRDPLYLSDPELIRQVGIKNFDTFTNHRKGITTEGFNDTSVISKSLSLRDRRWKQMRSTLTP  
TFTSLKIRQMFELIHFCNVEAVDFVQRQLDAGTSELELKDFTRYTNDVIATAAFGIQVNSFKDPNNEFF  
SIGQRISEFTFWGGLKVMYIILMPKLMKALRVPVMDMNNVDYFKKLVFGAMKYRKEQSIVRPDMIHLLME  
AQRQFKAEQEGSAESAAQQDKAEFNDDLLAQCLLFFSAGFETVATCLSFTSYELMMNPEVQEKLLEIL  
AVKEQLGEKPLDYDTLMGMKYLNCVSESIRKWPFAFIVDRMCGSDFQKDEEGEVVNLREDDLHVHINV  
GALHHDPDNFPPEQFRPERFDEEHKHEIRQFTYLPFGVGQRSCIGNRLALMEVKSLIFQLVLRYLKPT  
DRTPADMSSISGFRLPRELFWCKLESRGPA

>NP\_523645.1 cytochrome P450-9b1 [Drosophila melanogaster]

MSFVEICLVLATIGLLLFKSTGTGFAFEGRNLYFEKPYPFLGNMAASALQKASFQKQISEFYNRTRHHK  
LVGLFNLRTPMIQINDPQLIKKICVKDFDHFPHQTLNIPNERLVNDMLNVMRDQHWRNMRSVLTPVFTS  
AKMRNMF'TLMNESFAQCLEHLKSSQPIAAGENAFELDMKVLCKNLSNDVIATTAFLKVNFSFDDPENEFH  
TIGKTLAFSRGLPFLKFMCLLAPKVFNFKLTIFDSTNVEYFVRLVVDAMQYREKHNI TRPDMIQLLME  
AKKESKDNWTDDEIVAQCFFFAAFENNSNLICTTAYELLRNLDIQRERYEVEKQEQEALKGAPLTYDA  
AQEMTYMDMVISSESLRKWTL SAAADRCAKDYTLTDEGTKLFEFKAGDNINIPICGLHWDERFFPQPQR  
FDPERFSERRKDLIPYTYLPFGVGPRSCIGNRYAVMQAKGMLYNLMLNYKIEASPRTRDMWESARGFN  
IIPTTGFWMQLVSRK

>NP\_523527.1 cytochrome P450-4e3 [Drosophila melanogaster]

MWLAVLALLVPLITLVYFERKASQRRQLLKEFNGPTVPVILGNANRIGKNPAEILSTFFDWWDYDYGKN  
FLFWIGYSSHIVMTNPKQLEYIILNSQQLIQKSTIYDLLHPWLGHLLTSFGSKWHKHKRMITPSFHFNII  
QDFHEVMNENSAKFM'TQLKKASAGDTIIDFQEHANYLTLDVICDTAMGVPI NAMEQRDSSIVQAFRDMCY  
NINMRAFHPFKRSNRVFSLTPEFSAYQKTLKTLQDFTYDIEKRVYALQNGGSKEDHDPSLPRKKMAFLD  
TLLSSTIDGRPLTRQEIYEEVSTFMFEGHDTTTTSGVSFSVYLLSRHPDVQRKLYREQCEVMGHDMNRSVS



FQEIAKMKYLDLFIKEAQRVYPSVPIFIGRYCDKDYDINGSIVPKGTTLNALILLGYNDRIFKDPHHRP  
ERFEEKPAFFEYLPFSAGPRNCIGQKFALELKTIVISKVRSFEVLPVDELVSTDGRLNTYLGLAPDE  
KLRKREAGRHKYDPILSAVLTLSKSDNGLHLRLRERS

## AChE (17)

>P07140.1 RecName: Full=Acetylcholinesterase; Short=AChE; Contains: RecName:  
Full=Acetylcholinesterase 16 kDa subunit; Contains: RecName:  
Full=Acetylcholinesterase 55 kDa subunit; Flags: Precursor

MAISCRQSRVLPMSLPLPLTIPLPLVLVLSLHLSGVCVIDRLVVQTSSGPVGRSVTVQGREVHVYGTI  
PYAKPPVEDLRFKRPVPAEPWHGVLDATGLSATCVQERYEYFPGFSGEEIWNPNNTNVEDCLYINWAPA  
KARLRHGRGANGGEHPNGKQADTDHLIHNGNPQNTTNGLPILIIWIYGGGFMGTGSATLDIYNADIMAAVGN  
VIVASFQYRVGAFGLHLAPEMPSEFAEEAPGNVGLWDQALAIRWLKDNAHAFGGNPEWMTLFGESAGSS  
SVNAQLMSPVTRGLVKRGMMSQGTMNAPWSHMTSEKAVEIGKALINDCNCNASMLKTNPAHVMSCMRSVD  
AKTISVQQWNSYSGILSFPSAPTIDGAFLPADPMTLMKTADLKDYDILMGNVRDEGTYFLLYDFIDYFDK  
DDATALPRDKYLEIMNNIFGKATQAEREAIIFQYTSWEGNPGYQNNQQIGRAVGDHFFTCPTNEYAQALA  
ERGASVHYYYFTHRTSTSLWGEWVGVLHGDEIEYFFGQPLNNSLQYRPVERELGKRMLSAVIEFAKTGNP  
AQDGEWPNFSKEDPVYIFSTDDKIEKLARGPLAARCSFWNDYLPKVRSWAGTCDGDSGSASISPRLQL  
LGIAALIYICAAALRTRKRVF

>AAM94376.1 acetylcholinesterase [Aphis gossypii]

MDQWLLWFGYLVASTYGLSLRHRHQSVGTPTAEEIILEPQILIEDTDHVFRQRASDMFAQEPEYTEKRNL  
NHRRRSEFSGNQDTNFESSGATYSAYTSDDPLIIHTNKGKIRGITQEATGKLVDAWLGIPIYAKKPIGDL  
RFRHRPRIDRWDTTSPETILNCTTPPNTCVQIFDTLFGDFPGATMWNPNPVSSEDCLYINVVPRPRPQN  
AAMVWVIFGGGFYSGSATLDIYDPKILVSEENVILVSMQYRVASLGFLYFDTEDEVPGNAGLFDQLMALQW  
VHENIKLFGGNPNNTLFGESAGAVSVSLHLLSPLSRNLFNQAIMESGSSTVPWAILSREESFSRGLKLA  
KAMGCPDRNEIHKTVELRKNVSSAMVEKEWDHVAMCFFFPVVDGAFDDHPQKSLSTNNFKKTNIL  
MGSNSEEGYYFIFYLTELKKEENVVSRENFIKAIGQLNPNADA AVKSAIEFEYTDWFPNDPEKRN  
ALDKMVG DYQFTCNVNEFAHKYALTGNNVYMYFKHRS LN NPWKWTGVMHGDEISYVFGDPLNPNKRYE  
IEEIELSKMMRYWTNFAKTGNPSKTEGWSVTPKWPVRTAYGKEFLTLDTNNTSIGVGRLEQCAFWKN  
YVPDLTVISKSMKSDKNCTTISGGTKTNMIKLSVWTIVMTTAVLML

>AAM94375.1 acetylcholinesterase [Aphis gossypii]

MSVDCVYTSAVTLLLCCSAVLGRPSSNGGADAGGGGGGGGAGGAGGGGAGGGGGGS AVDDTDEIPVVV  
TSTGLVQGYTKIIANREVRVYTGIPFAKPPVQQLRFRRPVDPWTGVLNATRLPNTCYQERYEYFPGFV  
GEEMWSPNTKLS EDCLYLNIWIPKKQRTRHSSNNAHHAKIPVLVWIYGGGYMSGTSTLDIYDGDLLAATF

DVMIASMQYRLGAFGSLYLTPELPEDSDDAPGNMGLWDQALAIKWIKENAAAFGADPETITLFGESAGGG  
SVSVHLISPETGGMVKRGIIQSGTVNAPWSYMTGERAVEIAKKLLDDCNCNSTSLDSNPIGTMSCMRPVD  
ASTISKQWNSYSGILGFPSAPTVDGILLPEHPLDMLAKANFSDIDILIGSNLNEGTYFLLYDFVDFDR  
TSATALPREKFVQIVNVIKDRQTQLERDAIIYQYSGWEKKEVDDIYSNQQLSDVVADYFFVCPTNLFAN  
IVSSRGARVYYYYFFTHRTDSHLWGDWVGVLHGDEMQYVFGHLLNMSMPYNARERDLSIRIMEAFTRFSLT  
GTPVSDDDIDWPLYNESKPIYHVWNAEMHVGYGPRAAECQFWNGFFPKIAQALKETSKTTCEDYDPSMPT  
INENCTFTSSFATVNPQISFTIIFIFVLPAYGLF

>AAL99585.1 acetylcholinesterase precursor [*Myzus persicae*]

MSVDCVYTSAVTLLCCSAVLGRPSSNGGADGGGGGGGGGAGAGSGGGGGGGGGSGVDDTDESPVVV  
TSSGMVQGYTKIIANREVRVYTGIPFAKPPVGPLRFRRPVAVDPWTGVLNATRLPNTCYQERYEYFPGFV  
GEEMWNPNTKLSIEDCLYLNWIWPKKQTRHHSNNAHAKIPVLVWIYGGYMSGTSTLDIYDGDLLAATF  
DVMIASMQYRLGAFGSLYLTPELPEDSDDAPGNMGLWDQALAIKWIKENAAAFGADPETITLFGESAGGG  
SVSVHLISPETGRMVRRGIIQSGTVNAPWSYMTGERAVDIAKKLLDDCNCNSTLDSNPIATMSCMRAVD  
ASTISKQWNNYSYSGILGFPSAPTVDGVLLPEHPLDMLAKANFSDIDILIGSNLNEGTYFLLYDFVDFDR  
TSATALPKEKFVQIVNVIKDKTQLERDAIIYQYSGWEKKDVDDKYSNQQLSDVVADYFFVCPTNLFAN  
IVSSRGARVYYYYFFTHRTDSHLWGEWVGVLHGDEMQYVFGHPLNMSMPYNARERDLSIRIMEAFTRFSLT  
GTPVSDDDIDWPLYNESNPIYHVWNAEELHVGYGPRAAECQFWNGFFPKIAQALKETSKITCEDYDPSMPT  
TNENCTFTSSFASINPQISFAIIFIFVLPAGHLL

>AAN71600.1 acetylcholinesterase 2, partial [*Myzus persicae*]

MDQWLLWFSYLVASTYGLSLRHRHQSVGTPTAEIILEPQILIEDTDHVFRQRALDMFAQEPEYTEKRNL  
NHRRRSEFSGNQDNDFESSGETYSAYKSDDPLVIHTNKGKIRGITQAASTGKLVDAWLGIPIYAKKPIGDL  
RFRHPRPIDRWNTNPETILNCTTPPNTCVQIFDTLFGDFPGATMWNPNSPVSEDCLYINVVVPKPRPQN  
AAVMVWIFGGGFYSGSATLDIYDPKVLVSEENVILVSMQYRVASLGFLYFDTEDEVPGNAGLFDQLMALQW  
VHENIKLFGGNPNVTLFGESAGAVSVSLHLLSPLSRNLFNQAIMESGSSTAPWAILSREESYSRGLRLA  
RAMGCPDDRNEIHKTVECLRKANSSTMVEKEWDHVAICFFFPVVDGAFLLDDYPQKSLSTNNFKKTNIL  
MGSNSEEYYSIFYLTELFKKEENVVVSRENFVKAIGQLNPNADA AVKSAIEFEYTDWFSFNDPEKNRN  
ALDKMVG DYQFTCNVNEFAHKYALTGNNVYMYFKHRS LNNPWPKWTGVMHGDEISYVFGDPLNPNKRYE  
IEEIELSKMMRYWTNFAKTGNPSKTLKSWVTRQWPVHTAYGKEFLTLDTNNTSIACKTRQCA

>Q9TX11 Acetylcholinesterase, ACE (Acetylcholinesterase)

MKMSAVVRLCCNMISLLLCITVISPVYGFIDRLVVQTSSGPIRGRSTMVLGREVHVFNQVPPFAKPPVDGL  
RFRKPVPAEPWHGVLDATRLPSPCIQERYEYFPGFAGEEMWNPNTNVEDCLYLNIVVPTKTRLRHGRGL  
NFGNNDYFQDDDDFQRQHQS KGLLMLVWIYGGGFMSGTSTLDVYNAEMLAAVGNVIVASMQYRVGSFGE

FYLAPYLNDDDAPGNVGLWDQALAIRWLKENAKAFGGDPDLITLFGESAGGSSVSLHLLSPVTRGLSRRG  
ILQSGTLNAPWSHMSAEKALSVAEALIDDCNCNVTLTKDNPNYVMNCMRNVDAKTISVQQWNSYSGILGF  
PSAPTIDGVFMTADPMTMLREANLEGVEILVGSNRDEGTYFLLYDFIDYFEKDAATSLPRDKFLEIMNTI  
FSKASEPEREAIIFQYTGWESGNDGYQNOQQVGRSVGDHFFICPTNEFALGLAERGASVYYYYFTHRTST  
SLWGEWMGVLHGDEVEYIFGQPMNVSMQYRQRERDLSRRMVLSVSEFARSGNPALEGEHWPVYTKENPIY  
FIFNAEGEDDLRGEKYGRGPMATACAFWNDFLPRLRASVPPKSSCNILEQTSAAITLYVDIKIVTVLMV  
FILVRLY

>sp|Q869C3|ACES\_ANOGA Acetylcholinesterase OS=Anopheles gambiae GN=Ace PE=3 SV=3

MEIRGLLMGRLRLGRRMVPLGLLGVTALLLILPPFALVQGRHHELNNGAAIGSHQLSAAA  
GVGLASQSAQSGSLASGMSSVPAAGASSSSSSSSLLSSAEDDVARITLSKDADAFFTPY  
IGHGESVRIIDAELGTLEHVHSGATPRRRGLTRRESNSDANDNDPLVVNTDKGRIRGITV  
DAPSGKKVDVWLGIPYAQPPVGPLRFRHPRPAEKWTGVLNTTTPPNSCVQIVDTVFGDFP  
GATMWNPNTPLESDCLYINVVAPRPRPKNAAVMLWIFGGGFYSGTATLDVYDHRALASEE  
NVIVVSLQYRVASLGFLLGTPEAPGNAGLFDQNLALRWVRDNIHRFGGDPSRVTLFGES  
AGAVSVSLHLLSALSRLDFQRAILQSGSPTAPWALVSREEATLRALRLAEAVGCPHEPSK  
LSDAVECLRKGDPHVLVNEWGTLGICEFFFPVVDGAFLEDETPQRSLSAGRFFKTEILT  
GSNTEEGYFYIIYYLTELRLKEEGVTVTREEFQAVRELNYPVNGAARQAIVFEYTDWTE  
PDNPNNSRDALDKMVGDIYHFTCNVNEFAQRYAEEGNVYMYLYTHRSKGNPWRWTGVMH  
GDEINYVFGEPLNPTLGYTEDEKDFSRKIMRYWSNFAKTGNPNPNTASSEFFPEWPKHTAH  
GRHYLELGLNTSFVGRGPRLRQCAFWKKYLPLVAATSNLPGPAPPSEPCESSAFFYRPD  
LIVLLVSLLTATVRFIQ

>AAL33820.1 acetylcholinesterase [Plutella xylostella]

MIYNSKIVFTKLLLCICVCGARGRSWANHHDTTSTTTPAPTTPPPAPKNFHNDPLIVETKSGLVKGYAKT  
VMGREVHIFTGIPFAKPLGPLRFRKPVPIEPWHGVLEATAMPNSCYQERYEYFPGFEGEEMWNPNTNIS  
EDCLYLNIWVPQHLRVRHHQDKPLTERPKVPILVWIYGGGYMSGTATLDLYKADIMASSSDVIVASMQR  
VGAFFGLYLNKYFSPGSEEAAGNMGLWDQQLAIRWIKDNARAFGGDPELITLFGESAGGGSVSLHMLSPE  
MKGLFKRGILQSGTLNAPWSWMTGERAQDIGKVLVDDCNCNSSLLAVDPSLVMDCMRGVDAKTISVQQWN  
SYTGILGFPSAPTVDGVFLPKDPDTMMKEGSFHNTTEVLLGSNQDEGTYFLLYDFLDYFEKDGPSFLQREK  
FLEIVDTIFKEFSKIKREAIYVQYTDWEEITDGYLNQMIADIVGDYFFVCPTNYFAEVLADSGVDVYYY  
YFTHRTSTSLWGEWMGMVHGDEMEYVFGHPLNMSLQYHTREERDLAAHIMQSFTRFALTGKPHKPEEKWPV  
YSRASPHYTYTSAADAASGPAPPRGPRASACAFWNHFLNKLNELEHVPCDGAVTGPYSSMAGKSLPIVLLT  
ALATTAAL

>AAN37403.1 acetylcholinesterase [*Helicoverpa armigera*]

MISNTKIVFTKLLCCFVSGAVARSWANHHDTTSTTQTPTTSPVPKNFHDPLIVETKSGLVKGYAKT  
VMGREVHIFTGIPFAKPLGPLRFRKPVPIIDPWHGVLEATAMPNSCYQERYEYFPGFEGEEMWNPNTNIS  
EDCLYLNIVWPQHRLVRHHQDKPLAERPVPILVWIYGGGYMSGTATLDLYKADIMASSSDVIVASMQYR  
VGAFGFLYLNKYFSPGSEEAPGNMGLWDQQLAIRWIKDNARAFGGPELITLFGESAGGGSVSLHMLSPE  
MKGLFKRGILQSGTLNAPWSWMTGERAQDIGKVLVDDCNCNSSLLAADPSLVMDCMRGVDAKTISVQQWN  
SYTGILGFPSAPTVDGVFLPKPDPDMMKEGNFHNTTEVLLGSNQDEGTYFLLYDFLDYFEKDGPSFLQREK  
FLEIVDTIFKDFSKIKREAIIVFYQYTDWEEITDGYLNQKMIADVVDYFFVCPTNYFAEVLADSGVDVYYY  
YFTHRTSTSLWGEWMGMVHGDEMEYVFGHPLNMSLQYHTRERDLAAHIMQSFTRFALTGKPHKPDEKWPL  
YSRTSPHYTYTADGTSGPAGPRGPRASACAFWNDFLNKLNLELHMPDCGAVTGPYSSVAGTTLPIVLLT  
TLATTVAL

>AAM69920.1 acetylcholinesterase [*Bactrocera oleae*]

MAHPTSLLAGASLAAASSLSSRQYSVASSSRLSGDIGRGLFAIVVLLLRMSSVYGVDRLLVVQTSSGPVR  
GRSVTVQGREVHVYTGIPYAKPPLDDLRFKRPVPAEPWHGVLDATRLPATCVQERYEYFPGFSGEEIWNP  
NTNVSEDCLYINWAPAKARLRHGRGANGGEHSNKADTDHLIHNGNPQNI TNGLPVLIWIYGGGFMTGTA  
TLDIYNADIMSAVGNVIVASFQYRVGAFGFLHLS PAMPGYEEEEAPGNVGLWDQALAIRWLKTNAAHAFGGN  
PEWMTLFGESAGSSSVNAQLVSPVTAGLVKRGMMQSGTMNAPWSHMTSEKAVEIGKALINDCNCNASLLS  
ENPQAVMACMRAVDAKTISVQQWNSYSGILSFPSAPTIDGAFLPDHPMKMMETADLRGYDILMGNVRDEG  
TYFLLYDFIDYFDKDEATSLPRDKYLEIMNNI FGKVKPAERDAIIFRHTSWVGNPGLNQQQIGRAVGDH  
FFTCTNEYAQALAERGASVHYYYYFTHRTSTSLWGEWMGVLHGDEIEYFFGQPSNTSLQYRQVERELGKR  
MLNAVIEFAKTGNPATDGEWEPYFSKDPVYVVFSTDDKEEKLQRGPLEGRCAFWNEYLREVRKWSQCE  
VKPSSASSLQQQQHLLLQQRSIVAFMLLALSLVLKIPSVNAFF

>AAM69372.1 acetylcholinesterase precursor [*Musca domestica*]

MARSVRTPTSPSSSSSSWSSWSSPSSSYFYSLLSSFKASLTRPSSSSSVAHHLAARNNDICRGLFATLVI  
LLRMSALTSAMTDHLTVQTTSGPVRGRSVTVQGRDVHVFTGIPYAKPPVDDLRFKRPVPAEPWHGVLDAT  
RLPATCVQERYEYFPGFSGEEMWNPNTNVSEDCLFMNIWAPAKARLRHGRGTNGGEHSSKTDQDHLIHS  
TPQNTTNGLPILIWIYGGGFMTGSATLDIYNAEIMSAVGNVIVASFQYRLGAFGFLHLS PVMFGEFEEAP  
GNVGLWDQALALRWLKENARAFGGNPEWMTLFGESAGSSSVNAQLMSPVTRGLVKRGMMQSATMNAPWSH  
MTSEKAVEIGKALVNDNCNASLLPENPQAVMACMRQVDAKTISVQQWNSYSGILSYPSAPTIDGAFLPA  
DPMTLTKTADLSGYDILIGNVKDEGTYFLLYDFIDYFDKDDATSLPRDKYLEIMNNI FQKASQAEREAI I  
FQYTSWEGNPGYQNNQQQIGRAVGDHFFTCTNEYAQALAERGASVHYYYYFTHRTSTSLWGEWMGVLHGDE  
IEYFFGQPLNNSLQYRPVERELGKRMLNSVIEFAKSGNPAVDGEEWPNFSKEDPVYVVFSTDEKIEKLQR  
GPLAKRCSFWNDYLPKVRSWIGSECENKSSTSASAAIYEMKMQQLTLLAVAIILTMVNSIFQ

>AAK09373.1 acetylcholinesterase precursor [Schizaphis graminum]  
MDQWLLWFGYLVASTYGLSLRHRHQSVGTPTAEEIILEPQILIEDTDHVFRQRASDMFAQEPEYTEKRNL  
NHRRRSEFGNQDTEFASSETYSAYTSDDPLIIHTNKGKIRGITQTATGKLVDAWLGIPIYAKKPIGDL  
RFRHRPRPIDRWDTTTPETILNCTTPPNTCVQIFDTLFGDFPGATMWNPNPSPVSEDCLYINVVVVKPRPQN  
AAVMVWIFGGGFYSGSATLDIYDPKILVSEENVILVSMQYRVASLGFLYFDTEDEVPGNAGLFDQLMALQW  
VHENIKLFGGNPNNTLFGESAGAVSVSLHLLSPLSRNLFNQAIMESGSSTAPWAILSREESFNRLKLA  
KAMGCPDDRNTIHKTVELRKNASSVMVEKEWDHVAICFFFPVVDGAFDLDHPQKSLSTNNFKKTNIL  
MGSNSEEGYYSIFYLTELFKKEENVMSRENFIKAIGQLNPNADA AVKSAIEFEYTDWFSPNDPEKNRN  
ALDKMVG DYQFTCNVNEFAHKYALTGNNVYMYFKHRS LN NPWKWTGVMHGDEISYVFGDPLNPNKRYE  
IEEIELSKMMRYWTFNAKTGNPSKTEGSSWVTPKWPVHTAYGKEFLTLDTNNTSIGVGPRLQCAFWKN  
YVPDLTAISKSMKSDKNCTTISGGTKTNVIELSVWTIVMTTAVLML

>Q27677.1 RecName: Full=Acetylcholinesterase; Short=AChE; Flags: Precursor  
MGQSLILCLFVTVCASVCGYSWPSDETTTKPSQFKDFHTDPLVVETTSGLVRGYSKTVLGREVHVFTGIP  
FAKPPIEQLRFKKVPVIDPWHGILDATKQPNSCFQERYEYFPGFEGEEMWNPNTNISEDCLYLNIVPQR  
LRIRHHADKPTIDRPKVPVLIWIYGGGYMSGTATLDVYDADI IAATSDVIVASMQRGLSGFLYLNRIF  
PRGSEDETPGNMGLWDQILAIRWIKDNAAAFGGDPDLITLFGESAGGSSISIHLSIPVTKGLVRRGIMQSG  
TMNAPWSYMSGERAEQIGKILIQDCGCNVSLLENSPRKVMDCMRAVDAKTISLQQWNSYSGILGFPSTPT  
IEGVLLPKHPMDMLAEGDYEDMEILLGSNHDEGTYFLLYDFIDFFEKDGPSFLQREKYHDIIDTIFKNMS  
RLERDAIVFYQYTNWEHVHDGYLNQKMI GDVVGDYFFVCPTNNFAEVAADRGMKVFFYYFTHRTSTSLWGE  
WMGVIHGDEVEYVFGHPLNMSLQFNSRERELSLKIMQAFARFATTGKPVTDVNWPLYTKDQPYFIFNA  
DKNGIGKGRPRATACAFWNDFLPKLRDNGSSEAPCVNTYLSKIRSSSNELLPPSTSLVLIWIMTLLNAL

>P56161.1 RecName: Full=Acetylcholinesterase; Short=AChE; Flags: Precursor  
MFVNQRTRRPYMSVFVLVGAAVICPAYGIIDRLVVQTS SGP I RGRSTMVQGREVHVFNQVFPFAKPPVDS  
LRFKKVPAEPWHGVLDATRLPPSCIQERYEYFPGFAGEEMWNPNTNISEDCLYLNIVPPTKRLRHGRG  
LNFGSNDYFQDDDDFQRHQSKGGLAMLVWIYGGGFMSGTSTLDIYNAEILAAVGNVIVASMQRVGFAGF  
FLYLAPYINGYEEDAPGNMGMWDQALAIRWLKENAKAFGGDPDLITLFGESAGSSVSLHLLSPVTRGLS  
KRGILQSGTLNAPWSHMTAEKALQIAEGLIDDCNCLTMLKESPSTVMQCMRNVDAKTISVQQWNSYSGI  
LGFPSAPTIDGVFMTADPMTMLREANLEGIDILVGSNRDEGTYFLLYDFIDYFEKDAATSLPRDKFLEIM  
NTIFNKASEPEREAIIFQYTGWESGNDGYQNQHQVGRAVDHFFICPTNEFALGLTERGASVHYFFTHR  
TSTSLWGEWMLHGDEVEYIFGQPMNASLQYRQRERDL SRRMVL SVSEFARTGNPALEGEHWPLYTREN  
PIFFIFNAEGEDDLRGEKYGRGPMATSCAFWNDFLPRLRAWVSPKSPCNLLEQMSIASVSSTMPIVVMV  
VLVLIPLCAWWAIAKKNKTPPHQVILETRAFMH

>AAG43568.1 acetylcholinesterase, partial [*Apis mellifera*]

MTTRILLFFLLSSCTRPSRGNVAVSSQQRGNVHNDPLVVEVETTSGLVRFPRVLDKEVHVYFYGIPFAKP  
PIGPLRFRKPLPIEPWHGVLNATVLPNSCYQERYEYFPGFGEEMWNPNTNISEDCLYLNIWVPQKYRLR  
HKGDGSPGGNGGPRNGLPLLVWIYGGGFMSGTATLDVYNADIMAATSNVIIASMQYRVGAFGLYLNKH  
FTNSEEAPGNMGLWDQALALRWLRDNEAFGGDPELITIFGESAGGSSVSLHLISPVTRGLVRRGILQSG  
TLNAPWSYMSGEKANEVATILVDDCGCNSTMLNENPARVMACMRSVDAKTISVQQWNSYWGILGFPSAPT  
IDGIFLPKHPLDLLREADFKDTEILIGNNENEGTYFILYDFNDIFEKQASFLERERFLGIINNIFKNMS  
QIEREAITFQYTDWEEVYNGYIYQKMVADVVDYFFICPSIHFAQLFADRGMKVYYYYFTQRTSTNAMGR  
VD

>AAC02779.1 acetylcholinesterase [*Lucilia cuprina*]

MARFITSSSPTLTTSTAATAPSSSWSSNATSTATSISHSRSTSRKSRYTSSNLLNAFASLTSRSSLSL  
STSSNDLYRGFLTTLVILLRMSSVAYGITDRLIVQTTSGPVRGRAVTVQGREVHVFTGIPYAKPPVDDL  
FRKPVPAEPWHGVLDATRLPATCVQERYEYFPGFSGEEIWNPNNTNVEDCLYMNIWAPAKARLRHGRGAN  
GGEHSSKTPDHLIHSATPQNTTNGLPILIIWIYGGGFMGTSATLDIYNADIMSAVGNVIVASFQYRVGAF  
GFLHLSVMPGFEFEEAPGNVGLWDQALALRWLKENARAFGGNPEWMTLFGESAGSSSVNAQLVSPVTRGL  
VKRGMMSGTMNAPWSHMTSEKAVEIGKALINDCNCNASLLPANPQSVMACMRAVDAKTISVQQWNSYS  
ILSFPSAPTIDGAFLPADPMTLMKTADMSGYDIMIGNVKDEGTYFLYDFIDYFDKDEATSLPRDKYLEI  
MNNIFNKATQAEREAIFQYTSWEGNPGYQNOQQIGRAVGDHFFTCPTNEYAQAALERGAQVHYFFTHR  
TSTSLWGEWGMVHLGDEIEYFFGQPLNTSLQYRAVERELGKRMLNSVIEFAKTGNPAVDGEEWPNFSKED  
PVYYVFSTDEKTEKLQRGFLAKRCSFWDYLPKVRSWVGSECENNSAESAAVSIIYEKQQNLLKWVIMLT  
IMVTCIFQ

>AAF65202.1 acetylcholinesterase precursor [*Nephotettix cincticeps*]

MARLRFSTLSLSLLVAVATQPQPSTPRTLHSDHNHGFLNEHKHSHAHAYKSHDRAHNTHAQFAEATGPA  
STPSGGTPKHGDPLIVETTSGLVRLSKTVLGREVHVFTGIPFAKPPVGPPLRFRPVPVDPWHGVYDATT  
LSNSCYQERYEYFPGFEGEEMWNPNTNISEDCLYLNIWVPQRLRIRHKSSEENTYRQKVPVLIWIYGGG  
YMSGTATLDIYDADMVAATSDVIVASMQYRVGAFGLYLSPELPPGSEEAPGNLGLWDQALAIQWIKANI  
ANFGGDPELCTLFGESAGGSSVSLHLVSPVTRGLVRRGIMQSGTLNAPWSYMTGERAVEIAKTLIDDCGC  
NASMLIESPSRVMSCMRAVDAKTISVQQWNSYFGILGFPSAPTIDGVFLPKHPLDLLKEGDFQDTEILIG  
SNQDEGTYFILYDFIDYFEKDGPSFLQRDKFLDIINTIFKNFTRLERDAIFQYTDWEHANDGYLNQMI  
GDVVGDYFFICPTNLFAQAFSDHGLKVYFFFTQRTSTSLWGEWGMVHGDEIEYVFGHPLNMSLQYNAR  
ERDLRLIMQAYSRFALTGKPVSDINWPIYSREQPQYIFNAEKSGIGKGRATACAFWNEFLPRLRGO  
PDPECLADVAEVEVETSSPLVDNVSDNSTSTTFKPCTVITVLGLLLLTI



## Kdr (2)

>ALB75309.1 voltage gated sodium channel subunit 2 transcript variant 1 [Rhopalosiphum padi]

MSVYSSEELLDAGIIYRNKKEQLDVTIGDGMELLIRGEKNKKKKPPTSSSYNSFGMHQSSTDENYYLKDK  
YEYDTRSTKSYGSHEHDPYDSESHRGSKRSLHNAEEKDPSKEDVEINQNSGNDGIAAEEINGDEYKEQG  
PVEMVEDVFEEEEYPEDCFPPNCYKFFLAGDDETPFWLGGWQLRLKTFQLIENKYFETAVITMILLSS  
LALALEDVHLQHRPVLQDILYYMDRIFTVIFFLLEMLIKWLALGFRNYFTNAWCWLDIFIIVMVSLINFVAA  
LLGASGIQAFKTMRTLRLRALRPLRAMARMQGMRVVVALVQAIPSI FNVLLVCLIFWLI FAIMGVQLFAGK  
YYKCVDPKDGKTLNHEIIPDKNVCIAEMYKWENSKMNFDMGNAYLCLFQVATFNGWMEIMRDAVDSRDT  
HGKQPIREINNYMYFYVFFIIFGSFFTLNLFIVIIDNFNEQKKKTGASLEMFMTEDQKKYYNAMKKMS  
SKKPLKAI PRPRWRPQSIVFQTVTDKFKDMLIMLFIGFNMLTMTLDHYQQTKLFTDVLERLNQIFIAIFS  
TECLLKI FALRYYYFKEPWNLFDFVVI LSLAGLVLSDLISKYFVSPTLLRVVRVAKVGRVLRVLVKGAKG  
IRTL LFALAMSLPALFNICLLLFLVMFIFAIFGMSFFMNVDSHGGLDEDYNFRTFGQSMILLFMLSTSSG  
WDAVL DGITNEENCQKPNLEMGITGSCGSSAVGTAFLLSYLVINFLIVINMYIAVILENYSQATEDVQEG  
LTDDYDMYYEIQHFDPNGTRYIRYDQLSDFLDILEPPLKIHKPNKYKIVSMDIPICKGDLIYCV DILD  
ALTKDF FARKGNPIIETVAEIGEMQTRPEEAGYEPISSSLWRMREVYCAII IQNSWRKYTAAAKQQTADD  
ERSDGAASP DRETAVLVESDGFVTKNGHKVVIHSRSSSKSSRLADV

>AJS11555.1 voltage gated sodium channel variant 2 [Rhopalosiphum padi]

MSIADTDSSFSSEEKSLFRPFTRESLRAIEQRIAEDHAKQKELEEKRAEAGEVRYEDEDEDEGPQPDATLE  
QGAPL PVRLVGTFPPELASVPLEDIDPYHYNQKTFVVISKGDIFRFSATDGLWALDPFNPIRRVAIYIL  
VHPIFSVTIITITILTNCVFMIMPPTPTIEASEVIFTGIYTFESAVKVMARGFILEHFTYLRDAWNWLDIFI  
VIALAYVTMGIELGNLAVLRTFRVLRALKTVAIVPGLKTIVGAVIESVKNLRDVIILTFSLSVFALLGL  
QIYMGVLTQKCIKYFPTDGSAGNL TNENWF AFMSNSSNWQPGE EEPDEYPLCGNGTGAGQCKE GYMCIQG  
FGINPNYGYTSFDTFAWALLSAFRLMTQDNWEALYQQLRAAGPWHMFFFI VIIFLGSFYLVNLILAI VA  
MSYDELQKKAEEEEAAEEEAIREAEQA AKDREVRRAHEERVAERAERARHV TQHPKSPSDFSCQSYDNM  
FADGQDRGIGNDHHREKMSLRSVSITSHDKNSDTGSVDRQSGKTRKASLSLPGSPFNIRRASRGSHQLSH  
RNGRPRFTGADTKPLVNLTLDAEEHLPYADDSNAVTPMSEENGAIIVPVSYANFGSRHSSYTSHTSRIT  
YTSHADLFKPPMTKERQLRSRSARNYFNPSDQRYHRDDDYDSSMSKSKQKVDECGYNDSQKHTVVD MRD  
VMVLNDIIEQAAGRQSRGSEKAESTVYVFP TDEDAVDGEDEEEDEEPTFREKQVWLLKFIDTFCVWDC  
GWPWLK FQQLAFIVFDPFVELYITLCIVVNTLFMALDHHEMDPKLDFILNKANVFFSATFGVEAALKLM  
AMSPKYFQMGWNIFDFIIVILSVVELLSAGYQGLSVLRSFRLLRVFKLAKSWPTLNLLISIMGRTIGAL  
GNLTFVLCIIIFIFAVMGMQLFGKNYTEKMYLFRDHELPRWNFTDFLHSFMIVFRVLCGEWIESMWDCLH  
VGEPTCIPFFLATVVIGNLVVNLFLALLSNFGSSNLSVPTADSDTNKI TEAFERIGRFNKMMKTHIMN  
FLKALRAKITNQISVQASGRDRDIDL PVD ETIVDVIAPFKDTKEPVEMTIGDGMEFTIPGDVKQKIKKNQ  
VGNSIGNHQGNKVGNDYKKE SFDLDSLKC
